# Supplementary material for: Self-assembly of sodium and potassium betulinates into hydro- and organo-gels: entrapment and removal studies of fluorophores and synthesis of gel–gold nanoparticle hybrid materials
Source: Royal Society of Chemistry journal article supplement (doi:10.1039/c5ra25167b), 2016-01-01

## Supporting Information

**Self-assembly of sodium and potassium betulicates into hydro- and organo-gels: Entrapment and removal studies of fluorophores and synthesis of gel-gold nanoparticle hybrid materials**

**Braja Gopal Bag,\* Shib Shankar Dash**

Department of Chemistry and Chemical Technology, Vidyasagar University,

Midnapore 721102, West Bengal, India

*Email: braja@mail.vidyasagar.ac.in*

| <b>Table of Contents</b>                                                                        | <b>Pages</b> |
|-------------------------------------------------------------------------------------------------|--------------|
| 1. Figure S1 and S2: Optical micrograph images of salts <b>2</b> and <b>3</b>                   | S3           |
| 2. Figure S3: SEM images of dried self-assemblies of <b>2</b>                                   | S4           |
| 3. Table S1: Thermodynamic parameters of sodium betulinate <b>2</b>                             | S5           |
| 4. Figure S4: $\ln K$ vs $1/T$ (K) plot of <b>2</b> and <b>3</b>                                | S6           |
| 5. Figure S5 and S6: FTIR images of <b>1</b> , <b>2</b> and <b>3</b>                            | S7           |
| 6. Figure S7: POM images of <b>3</b> loaded with Rhodamine B                                    | S8           |
| 7. Table S8: Fluorescence Emission spectra of potassium betulinate <b>3</b>                     | S8           |
| 8. Figure S9: UV-visible spectra obtained during dye removal studies                            | S9           |
| 9. Figure S10: Structure of the chemicals present in the bark extract of <i>Ziziphus jujube</i> | S10          |
| 10. $^1\text{H}$ and $^{13}\text{C}$ NMR of sodium betulinate <b>2</b>                          | S11          |
| 11. $^1\text{H}$ and $^{13}\text{C}$ NMR of potassium betulinate <b>3</b>                       | S12          |

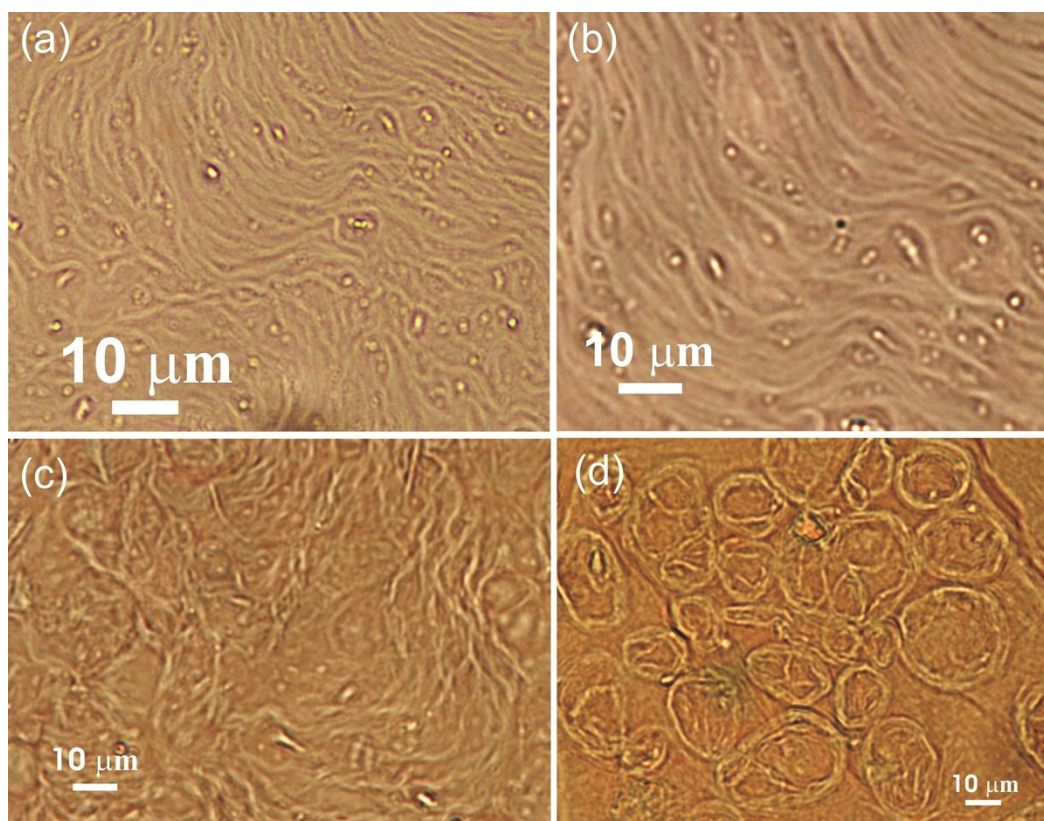

**Figure S1:** Optical micrographs of potassium betulinate **3**: (a, b) 1.67% w/v in water; (c) 2.8% w/v in EG-water (1:1v/v) and (d) 1.9% w/v in DMF-water (1:1 v/v)

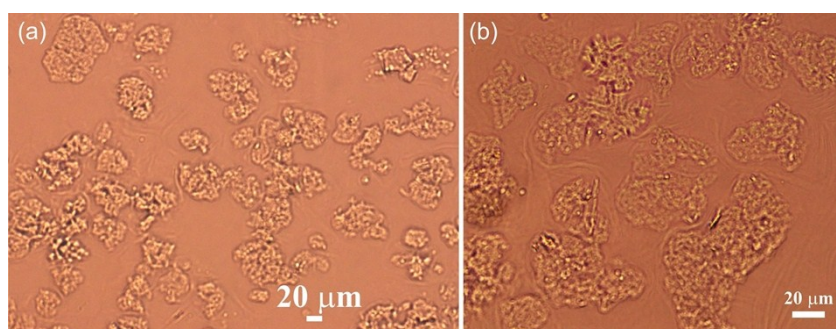

**Figure S2:** Optical micrographs of sodium betulinate **2** (2.1% w/v) in EG-water (1:1 v/v)

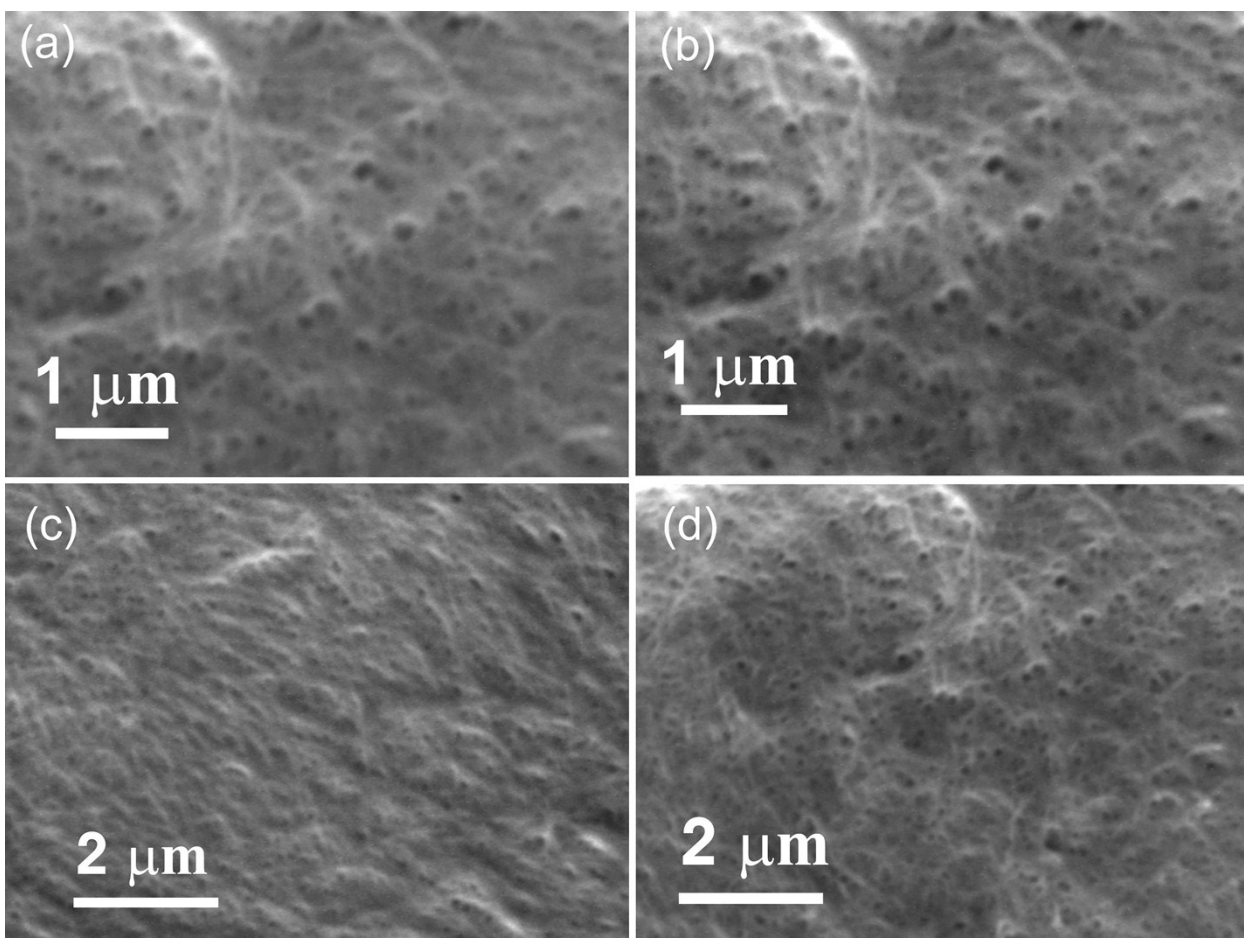

**Figure S3:** SEM images of dried self-assemblies prepared from a hydrogel of sodium betulinate **2** (0.71 % w/v).

### Calculation of thermodynamic Parameters:

The thermoreversible melting of a gel can be expressed as:

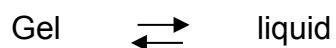

The equilibrium constant can be expressed as:

$$K = [\text{Gelator}] / [\text{Gel}]$$

Assuming unit activity of the gel, the equilibrium constant can be expressed as:

$$K = [\text{Gelator}]$$

The Gibbs free energy change during gel melting can be expressed as:

$$\Delta G^\circ = -RT \ln K = \Delta H^\circ - T\Delta S^\circ, \text{ Hence, } \ln K = -\Delta H^\circ/R \cdot (1/T) + \Delta S^\circ/R$$

**Table S1:** Thermodynamic parameters ( $\Delta H^\circ$ ,  $\Delta S^\circ$ ,  $\Delta G^\circ$ ) at 298 °K of the sodium betulinate gel melting in different liquids.

| Liquids    | $\Delta H^\circ$ kJ/mol | $\Delta S^\circ$ J/mol/°K | $\Delta G^\circ$ kJ/mol |
|------------|-------------------------|---------------------------|-------------------------|
| DMSO-water | 76.01                   | 202.36                    | 15.71                   |
| DMF-water  | 58.71                   | 154.39                    | 12.7                    |

The gel melting temperature ( $T_{gel}$ ) increases with increasing concentration of the "solutes". A plot of  $\ln K$  vs  $1/T$  allowed us to calculate the thermodynamic parameters. Representative plots for gel in DMSO-water (1:1v/v) and DMF-water (1:1v/v) for both **2** and **3** were given in the figure below:

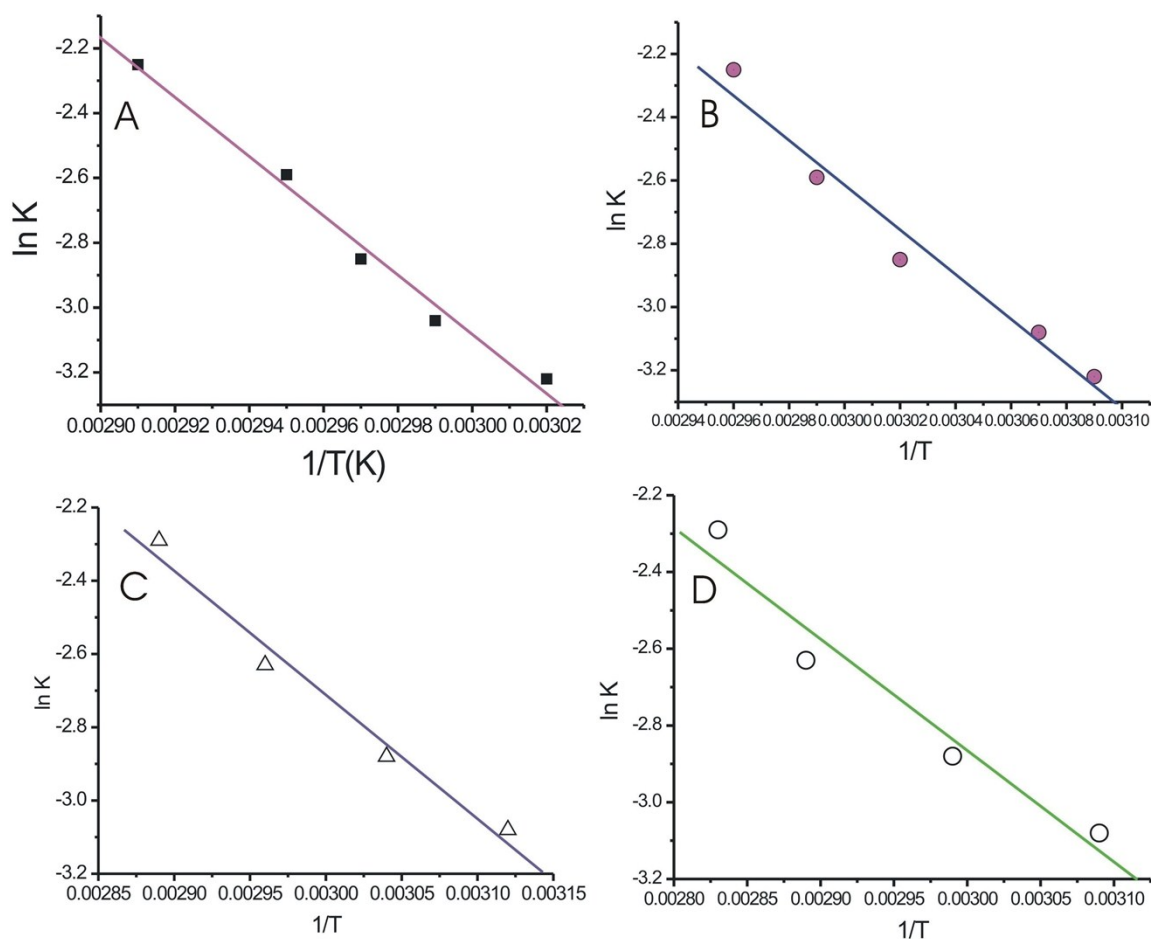

**Figure S4:**  $\ln K$  vs  $1/T$  (K) plot of (A) **2** in DMSO-water; (B) **2** in DMF-water; (C) **3** in DMSO-water and (D) **3** in DMF-water.

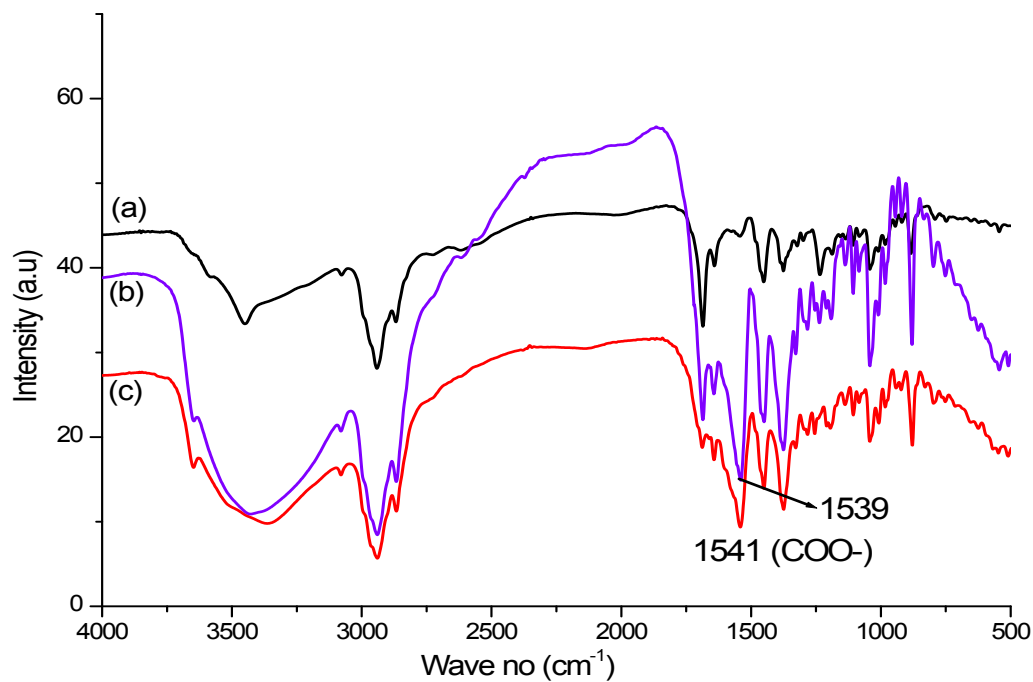

**Figure S5:** FTIR spectra (a) powder sample of betulinic acid **1**; (b) dried self-assemblies prepared from a hydrogel of **2** and (c) powder sample of **2**.

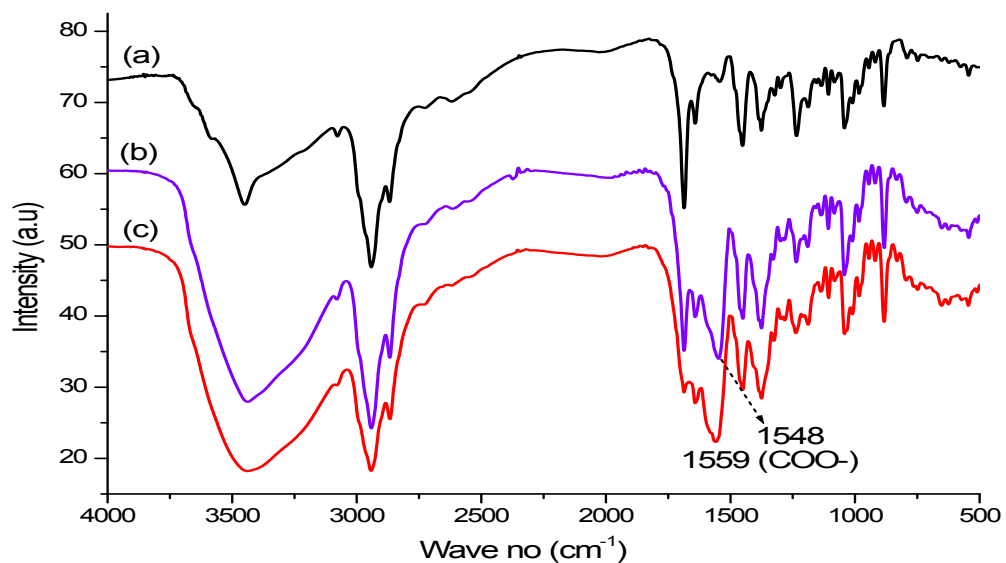

**Figure S6:** FTIR spectra (a) powder sample of betulinic acid **1**; (b) dried self-assemblies prepared from a hydrogel of **3** and (c) powder sample of **3**.

**Epifluorescence Microscopy:** The epifluorescence microscopy images revealed the entrapment of rhodamine B on the self-assemblies of potassium betulinate **3** in water.

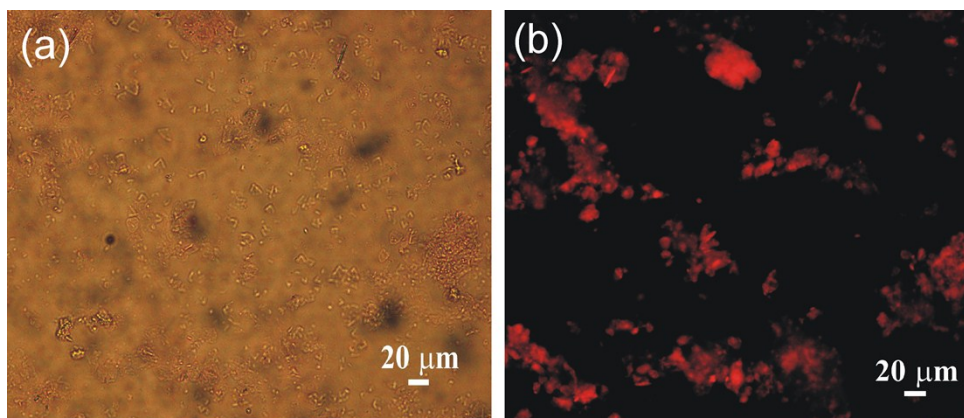

**Figure S7:** (a-b) Self-assemblies of potassium betulinate **3** loaded with rhodamine B in water: (a) under normal light; (b) under fluorescence light.

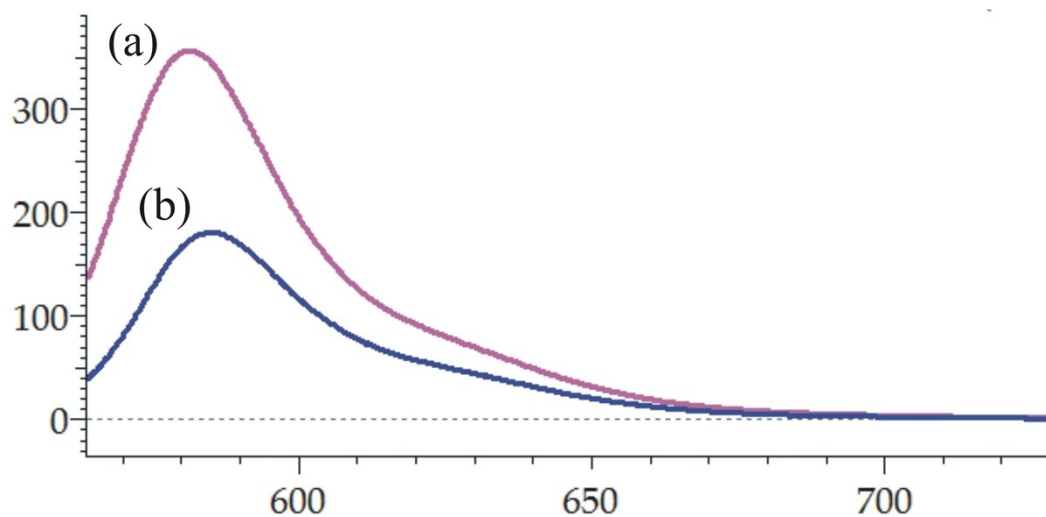

**Figure S8:** Fluorescence Emission Spectra: (a) rhodamine-B ( $c = 0.03$  mM) in phosphate buffer (0.01 M, pH = 7.2); (b) in the presence of a hydrogel obtained from potassium betulinate **3** after 4 hours. Upon excitation at 554 nm (rhodamine B), emission spectra appeared at 581.4 nm. Decrease of fluorescence intensity with time indicated the removal of rhodamine-B dye from the aqueous buffer solution.



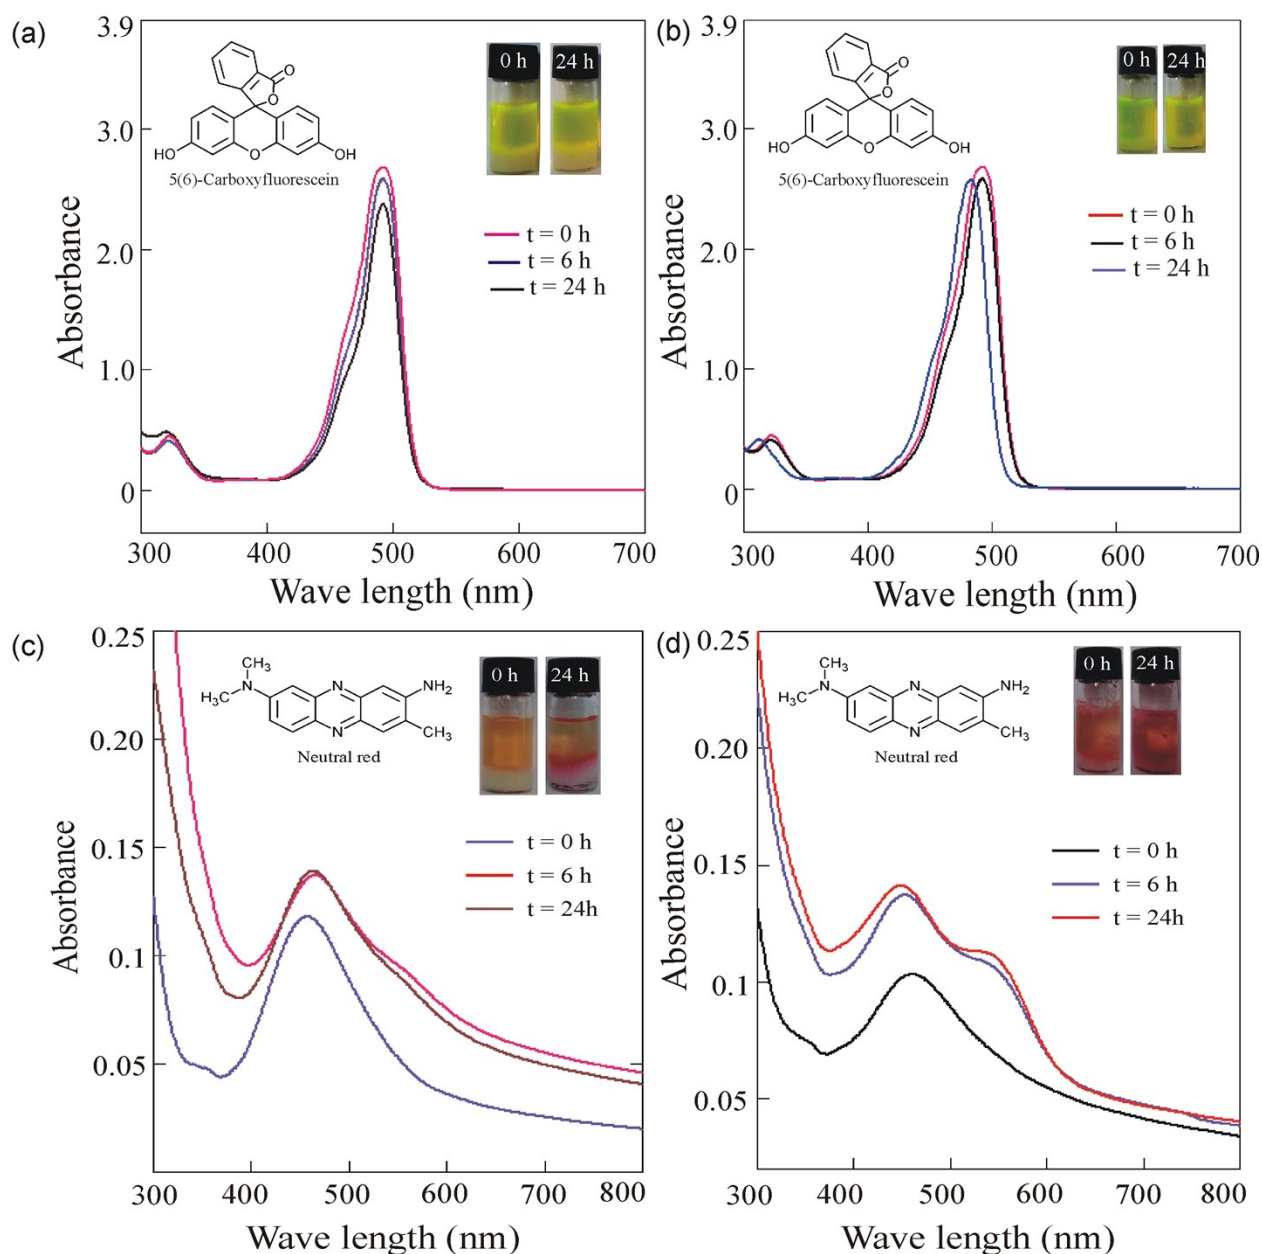

**Figure S9:** (a, b) UV-visible spectroscopy of CF solution kept in contact with the hydrogels of sodium betulinate **2** (2.5% w/v) and potassium betulinate **3** (2.5% w/v) respectively; (c, d) UV-visible spectroscopy of NR solution kept in contact with the hydrogels of sodium betulinate **2** (2.5% w/v) and potassium betulinate **3** (2.5% w/v) respectively, Inset: *left*: structure of the dye molecules, *right*: photograph of vials at different times.

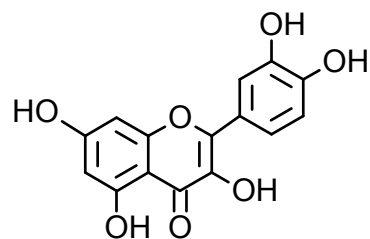

Quercetin

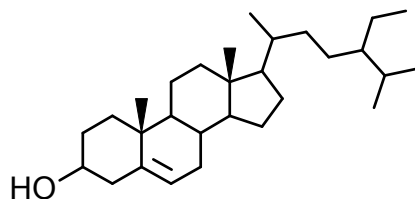

Beta-sitosterol

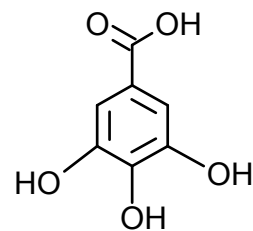

Gallic acid

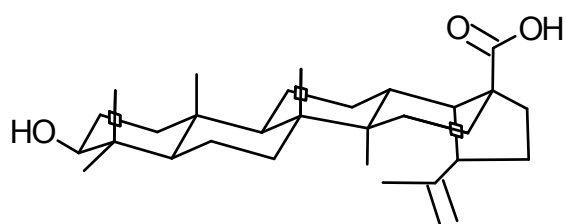

Betulinic acid

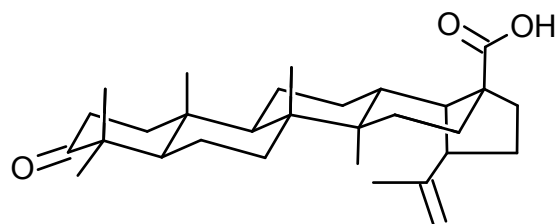

Betulonic acid

**Figure S10:** Probable structures of compounds present in the bark extract of *Ziziphus jujube*, as evident from the mass spectral analysis.

<sup>1</sup>H-NMR (400 MHz, DMSO-d<sub>6</sub>)

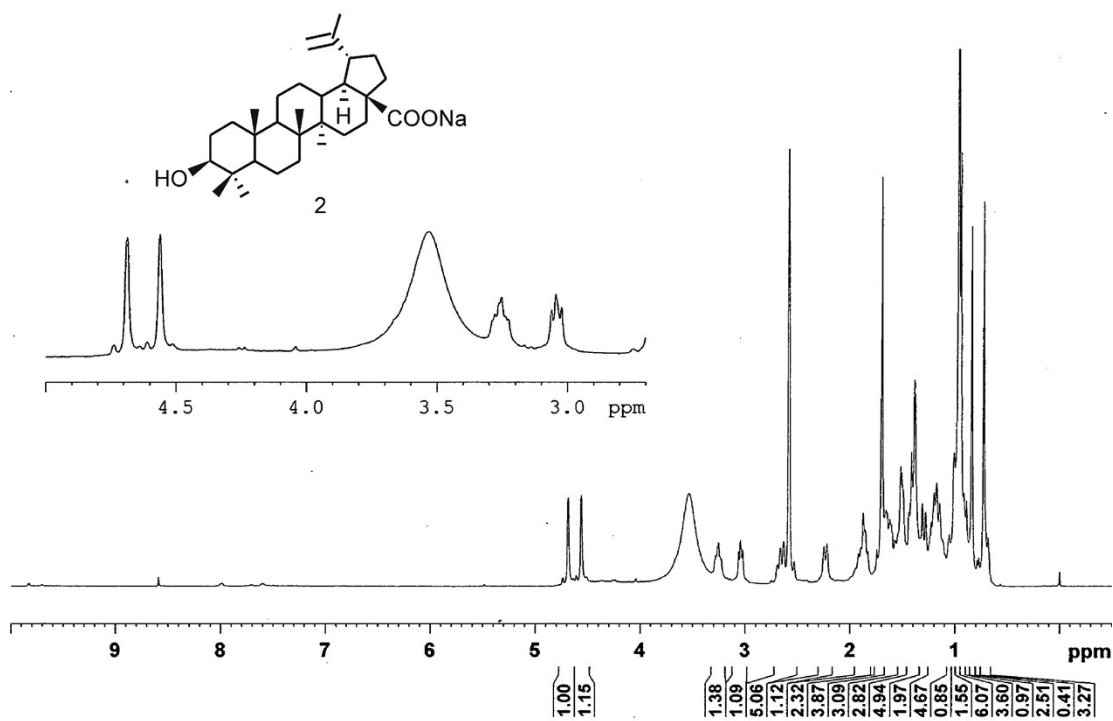

<sup>13</sup>CNMR (100 MHz, DMSO-d<sub>6</sub>)

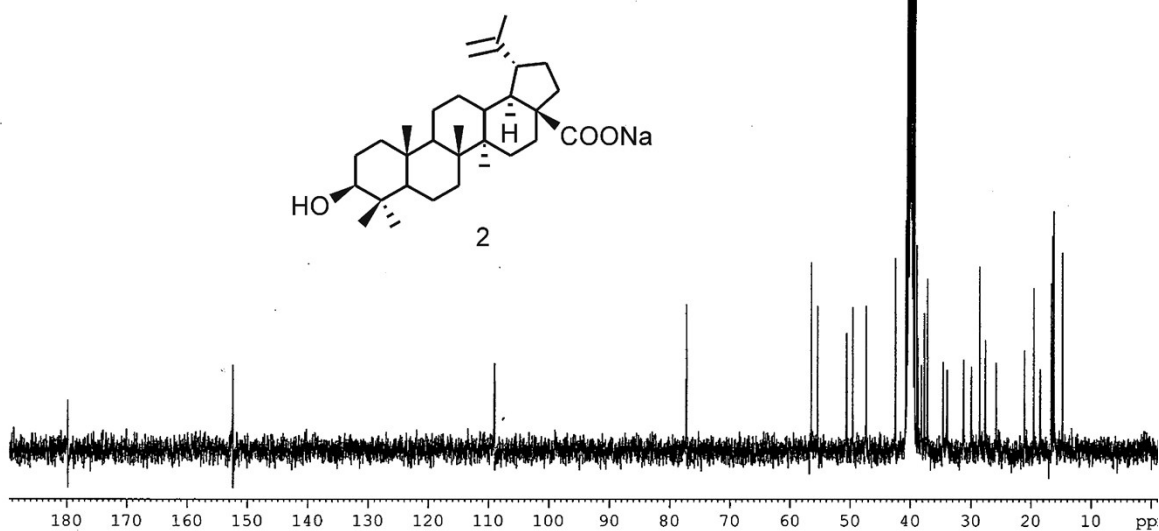

$^1\text{H-NMR}$  (400 MHz,  $\text{DMSO-d}_6$ )

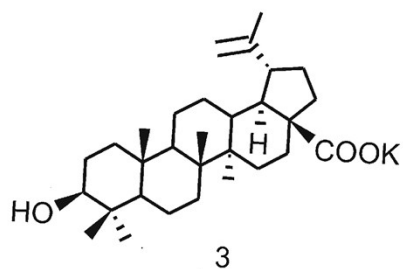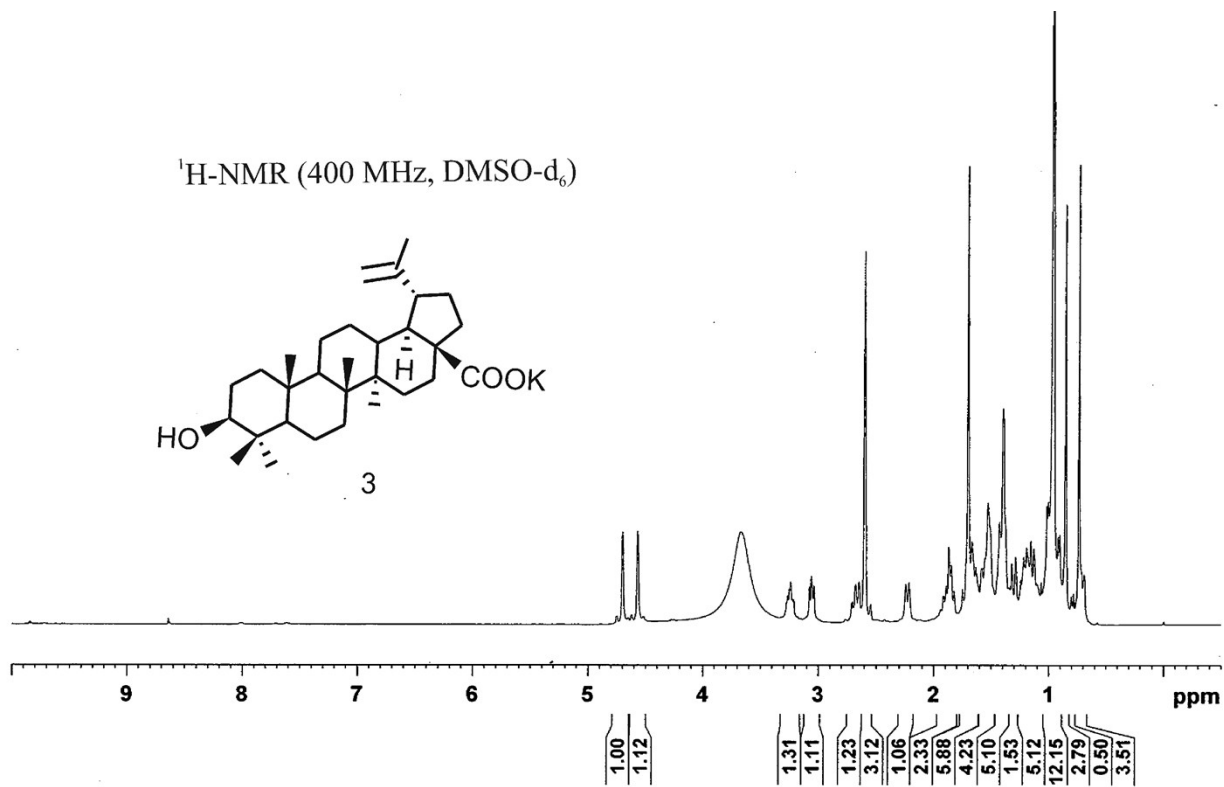

$^{13}\text{C-NMR}$  (100 MHz,  $\text{DMSO-d}_6$ )

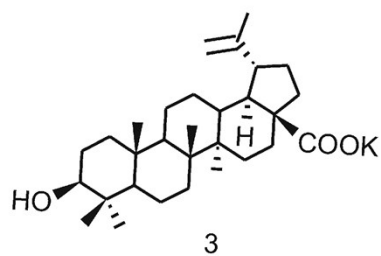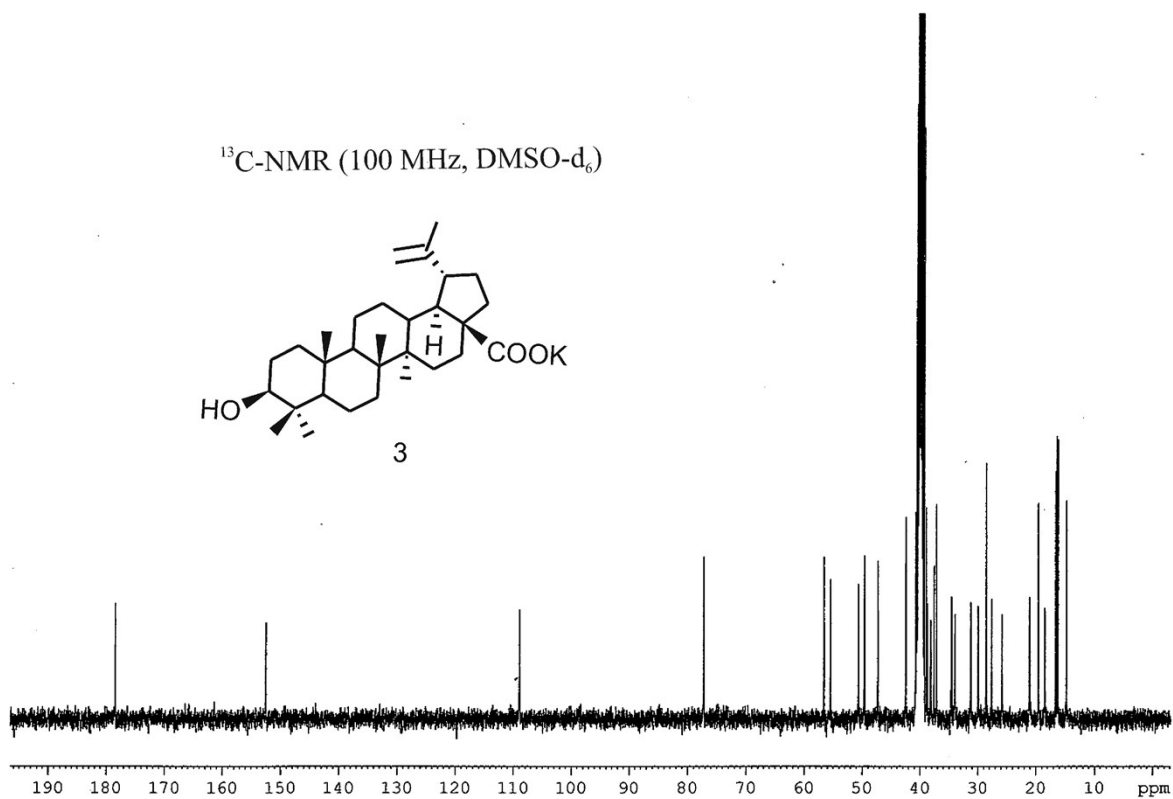

Supplement: c5ra25167b1.pdf [file c5ra25167b1.pdf]
